# Supplementary material
Source: PubMed Central journal article supplement (PMC6394229)
Supplement: NIHMS1517736-supplement-1.pdf [file NIHMS1517736-supplement-1.pdf]

## Supplemental Information

|                                                            |      | Catalytic loop                                              |      |
|------------------------------------------------------------|------|-------------------------------------------------------------|------|
| <i>Francisella novicida</i> (FTN_0131)                     | 245- | L I Q I L F Y V C V L I E N D F H I C N F G T G L F N G --  | -272 |
| <i>Fangi hongkongensis</i> (FSC776_contig_24)              | 226- | L I S L L V Y M Y F L I E D D A H K K N F G V A Q F S V A N | -255 |
| <i>Piscirickettsia salmonis</i> (KU39_2076)                | 201- | A G A D I A L M L Y P D G - D N H Q C N N G - - - - - V     | -222 |
| <i>Vibrio neptunus</i> (TW84_00590)                        | 242- | L L S I V L L S Y L L V E D D L H I K N I G L C T I N G --  | -259 |
| <i>Rickettsia rickettsii</i> (Rrlowa_0230)                 | 281- | F E K A I A A C H M L G E V D Y H A G N L M V - - - Q D --  | -305 |
| <i>Orientia tsutsugamushi</i> (OTSTA763_0692)              | 280- | F E K V I A A C H M L G D I D Y H G A N L M V - - - L D --  | -304 |
| <i>Aneurinibacillus aneurinilyticus</i> (HMPREF0083_01154) | 117- | L L K M F V F D I W I C N I D R H G G N L L V Y P V G E --  | -144 |
| <i>Hyphomonadaceae bacterium</i> (VR75)                    | 90-  | L G K L Y A F D T W I A N I D R H A G N L I F - - - G G --  | -124 |
| <i>Candidatus Berkiella cookevillensis</i> (CC99x_00439)   | 174- | L G Y I I A N V L W H G D H D V H M G N F V R I E K D G --  | -201 |
| <i>Bdellovibrio bacteriovorus</i> (AZI86_00695)            | 434- | P E S F V F F D Y L I E N G D R H S D N Y L V R A D G R --  | -461 |
| <i>Comamonas testosteroni</i> (P608_25000)                 | 100- | L G R L I A F D V L I R N A D R H P G N L L T - - - D - -   | -123 |
| <i>Silvanigrella aquatica</i> (AXG55_10680)                | 194- | L G E V L A A S L W L G D Y D I H I G N I G I A K V A N K A | -223 |
| <i>Verrucomicrobia bacterium</i> (AUJ82_07980)             | 257- | S Y A V L A S L L F L T E A D P H L G N I M I K K D K N K H | -286 |
| <i>Legionella pneumophila</i> (LegA5)                      | 162- | L A S I L A T S Y T L E E D D L H K G N F G F Y L V K K --  | -189 |
| <i>Midichloria mitochondrii</i> (midi_01244)               | 308- | F P Q A M V T S L L I A D Y D V H W G N V G V V S E N G --  | -335 |
|                                                            |      | Activation loop                                             |      |
| <i>Francisella novicida</i> (FTN_0131)                     | 272- | - - - - - K R C Y S K I D H D Y I V S F - - - W D A L K Y   | -293 |
| <i>Fangi hongkongensis</i> (FSC776_contig_24)              | 255- | - - Q D G K F S A Y G K I D H D Y L A T H - - - W E K G Q S | -280 |
| <i>Piscirickettsia salmonis</i> (KU39_2076)                | 223- | S I N Q A G R L Q Y S K I D H D Y S S A R - - - L Q Q H K P | -250 |
| <i>Vibrio neptunus</i> (TW84_00590)                        | 259- | - - - - - R T V F G K I D H D Y I V S K - - - W E E K K N   | -290 |
| <i>Rickettsia rickettsii</i> (Rrlowa_0230)                 | 305- | - - - - - G K T I T K I D H G R S F L A - - - F H K N F S   | -326 |
| <i>Orientia tsutsugamushi</i> (OTSTA763_0692)              | 304- | - - - - - G K T V A K I D H G R S F M Q - - - Y H K D F A   | -325 |
| <i>Aneurinibacillus aneurinilyticus</i> (HMPREF0083_01154) | 144- | - - - - - K Y D F Y L I D H G L S L L G A V Q W Q G         | -165 |
| <i>Hyphomonadaceae bacterium</i> (VR75)                    | 124- | - - - - - K D A I W L I D H G H S F T G P K W T A G         | -135 |
| <i>Candidatus Berkiella cookevillensis</i> (CC99x_00439)   | 201- | - - - - - G V K Y S K I D H G F S F F N - - - F D K E I V   | -222 |
| <i>Bdellovibrio bacteriovorus</i> (AZI86_00695)            | 461- | - - - - - K - - - V A I D H G L A L D A - - W H V P D F     | -479 |
| <i>Comamonas testosteroni</i> (P608_25000)                 | 123- | - - - - - G Q D Y W A I D H G R T L D L H P - Y Q G H       | -144 |
| <i>Silvanigrella aquatica</i> (AXG55_10680)                | 124- | D L K Y G Y K Y D F V K I D H G W S F A Y - - - L Q N Q M N | -250 |
| <i>Verrucomicrobia bacterium</i> (AUJ82_07980)             | 287- | Y L G - - - - - K I D H D G S F M D - - - M Y S K Q W       | -305 |
| <i>Legionella pneumophila</i> (LegA5)                      | 189- | - - Q G K P R V V F F K I D H D L M F V D - - - S I M S F T | -214 |
| <i>Midichloria mitochondrii</i> (midi_01244)               | 335- | - - - - - Q N K M V R I D F G W A F K K - - - L T P K L N   | -356 |

**Figure S1. OFPs possess two conserved amino acid motifs. Related to Figure 1.**

Partial alignment of OFP sequences from species representative of each OFP-containing genus, highlighting the two conserved motifs (perfectly conserved residues, black; highly conserved residues, dark grey; conserved residues, light grey).

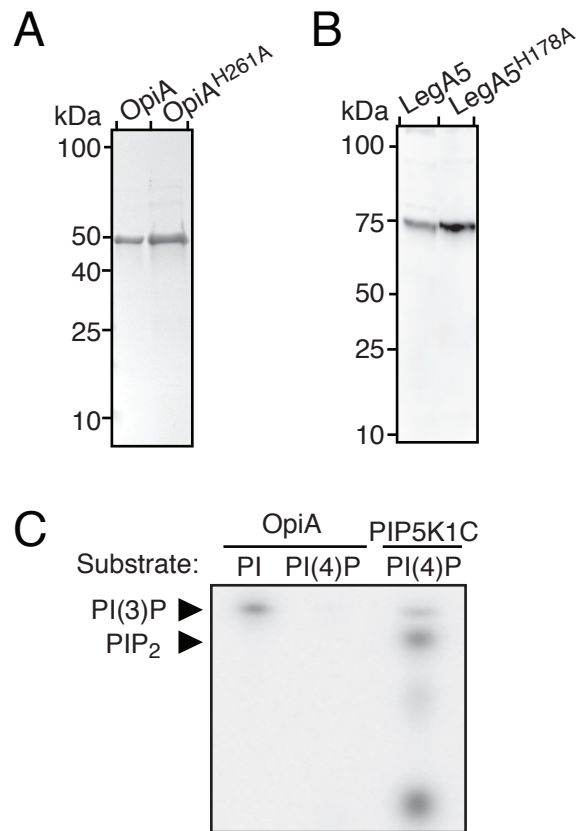

**Figure S2. Amino acid substitutions in the catalytic motifs do not destabilize OpiA and LegA5 and OpiA does not phosphorylate a PI(4)P lipid substrate. Related to Figure 2.**

(A) Coomassie brilliant blue staining of purified OpiA and OpiA<sup>H261A</sup>.

(B) Western blot analysis of purified LegA5 and LegA5<sup>H178A</sup>.

(C) Autoradiographs of thin layer chromatography (TLC)-separated lipid products produced by incubating the denoted proteins with [ $\gamma^{32}$ P]-ATP and the indicated lipid substrates.

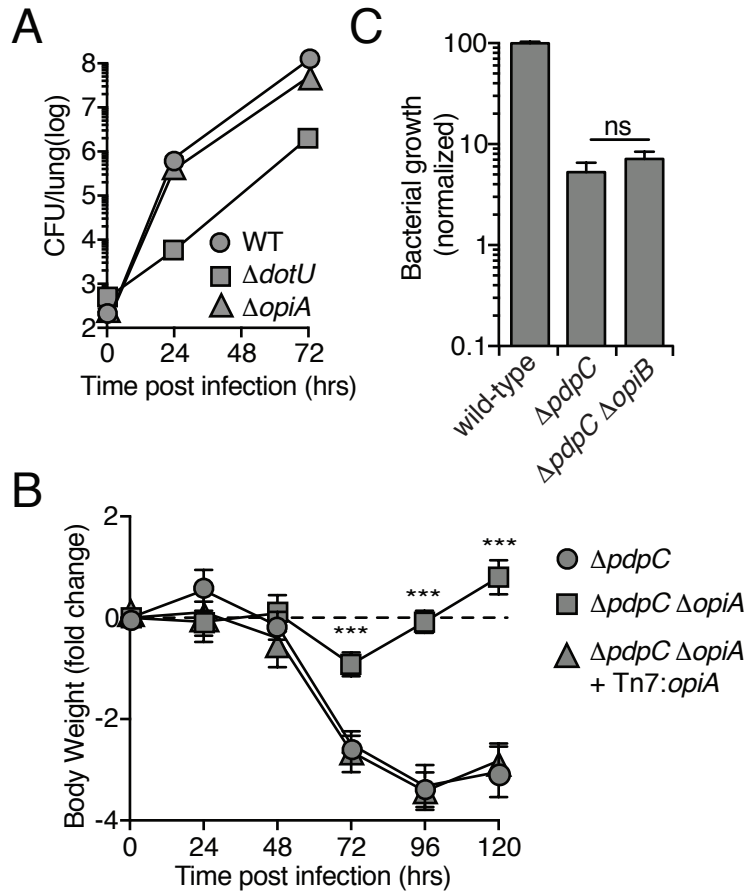

**Figure S3. Phenotypic characterization of selected *F. novicida* mutants containing deletions of genes encoding secreted effectors. Related to Figure 3.**

(A) Bacterial burden in the lungs of mice infected via the aerosol route with the indicated strains of *F. novicida*.

(B) Change in body weight over time of mice infected by the aerosol route with indicated strains of *F. novicida*. Data in A-C are shown as the mean  $\pm$  s.d. and asterisks represent statically significant differences (Student's t-test; \*\*\* $p < 0.0001$ ).

(C) Growth at 24hrs of the indicated strains of *F. novicida* in RAW 264.7 cells, normalized to level of growth by the wild-type strain (100%).

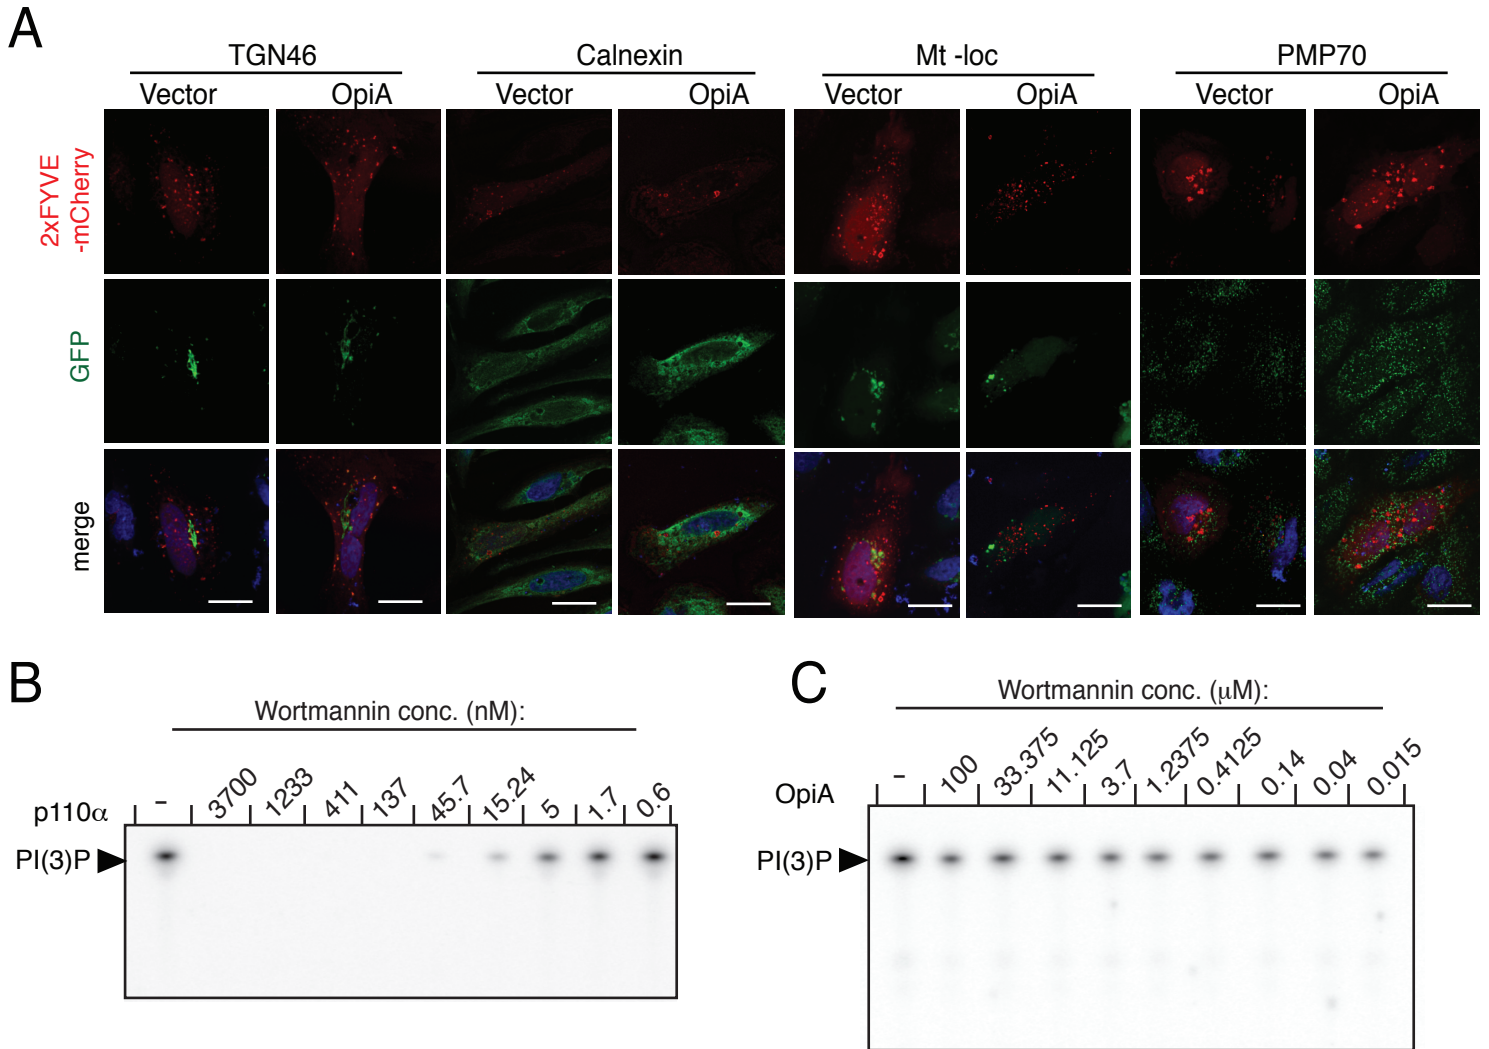

**Figure S4. OpiA is a Wortmannin-insensitive PI3K that generates PI(3)P on endosomes. Related to Figure 4.**

(A) Representative fluorescent images of HeLa cells expressing 2xFYVE-mCherry, co-transfected with vectors expressing the indicated proteins and stained (green) for the indicated markers (TGN46, Calnexin and PMP70, immunofluorescence; mitochondria, co-transfection to express GFP-labeled mitochondrial targeting sequence). Scale bar, 10  $\mu$ M.

(B and C) Autoradiographs of thin layer chromatography (TLC)-separated lipid products produced by incubating the indicated proteins with [ $\gamma$ <sup>32</sup>P]-ATP, PI-containing liposomes and wortmannin at the designated

Table S1: Oligonucleotides used in this study. Related to the STAR Methods section

| Oligonucleotides                                                             |            |     |
|------------------------------------------------------------------------------|------------|-----|
| #1: 5'-AGCATCACGTAAGCTTAGCTTAATTTTATAAGAATGTTTTCTGGATTTG-3'                  | This paper | N/A |
| #2: 5'-TCAGTAACGGATCCTCCTAGTGGTATGTCTTATAAATAAGATTATAG-3'                    | This paper | N/A |
| #3: 5'-GATAATAGTATTGTGCTAGAGTTAGATGCAGGAC-3'                                 | This paper | N/A |
| #4: 5'CATAAGTCCACAAAGAACTTGGATGCTTATTTCC-3'                                  | This paper | N/A |
| #5: 5'-TCAGTAACCCATGGGCAAAAATTTGAAGTAATACGCAAAGATTTTC-3'                     | This paper | N/A |
| #6: 5'-TCAGAAATCTCGAGATTCAACAAATTACACAAATGAGAAAATC-3'                        | This paper | N/A |
| #7: 5'-GTACCAAATTACAGATAGCAAATCATTCTATTAACACACAAACATAAAATAAAATTTGTATTAGTC-3' | This paper | N/A |
| #8: 5'-GTTAATAGAAAATGATTTTGCTATCTGTAATTTTGGTACAGGACTATTTAATGGAAG-3'          | This paper | N/A |
| #9: 5' TCAAGTACTACATATGCCTAGAGTTTATAATCTTAAAGATATTTATCTGG-3'                 | This paper | N/A |
| #10: 5'-TCAGTAACCTCGAGTTAGATTTTATTCTTTGATAGTGATATATCCAAAAAGACATTATCC-3'      | This paper | N/A |
| #11: 5'-TCCCTTTAGCCAAATCGTCTTCTTCCAAAG-3'                                    | This paper | N/A |
| #12: 5'-AGACGATTTGGCTAAAGGGAATTTTGGTTTTTATTTG-3'                             | This paper | N/A |
| #13: 5'-TCAGTAACGGATCCATGAAAAATTTGAAGTAATACGCAAAGATTTTC-3'                   | This paper | N/A |
| #14: 5'-TCAGAAATGCGGCCGCTCAATTCAACAAATTACACAAATGAGAAAATC-3'                  | This paper | N/A |
| #15: 5'-AGAATCAGTGGATCCATGTCAGACATCGAAGAAGGTACGC-3'                          | This paper | N/A |
| #16: 5'-CTGAAAGATAGCGGCCGCTTAGTATTGGCCTTGTTGCGGTTC-3'                        | This paper | N/A |
| #17 5'-ACATGATGCCTCGAGGCCACCATGAAAAATTTTGAAGTAATACGCAAAGATTTTC-3'            | This paper | N/A |
| #18: 5'CTACCCGGTAGAATTCTTAATTCAACAAATTACACAAATGAGAAAATC-3'                   | This paper | N/A |
